# Supplementary material
Source: Springer Nature journal article supplement (https://www.springermedizin.de/resource/supplementary/11689_2013_40_MOESM3_ESM.pdf/9673098)

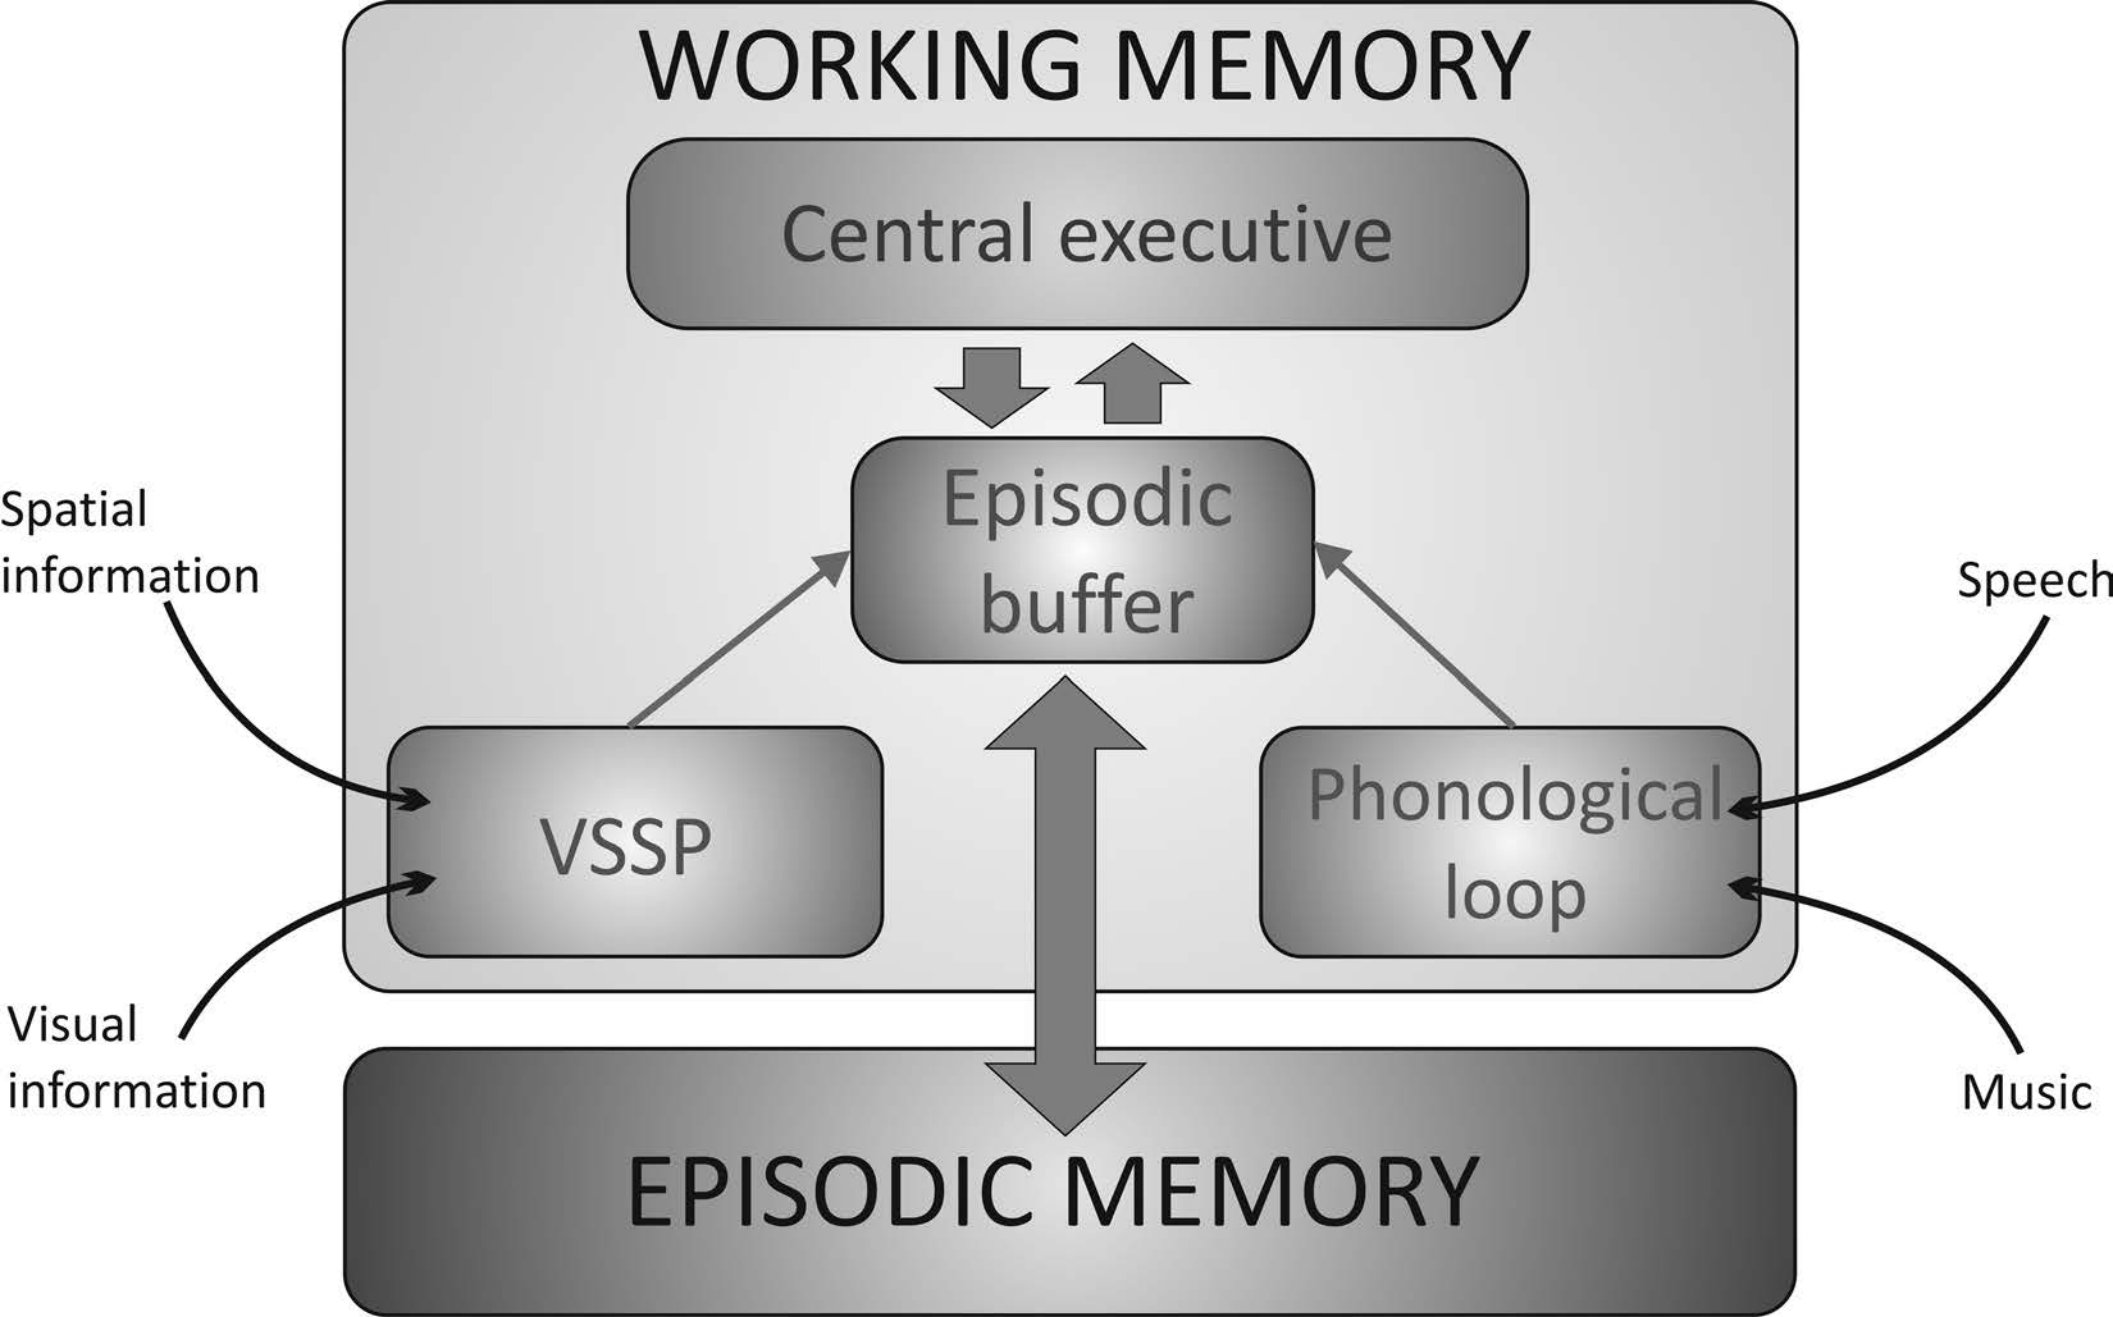

Supplement: MOESM3 [file 9673098]
